# Supplementary material for: MoS2/SnS/CoS Heterostructures on Graphene: Lattice-Confinement Synthesis and Boosted Sodium Storage
Source: MDPI journal article supplement (doi:10.3390/molecules28165972), 2023-08-09
Supplement: s1 [file s1]

## SUPPLEMENTARY MATERIALS

### MoS<sub>2</sub>/SnS/CoS Heterostructures on Graphene: Lattice-Confinement Synthesis and Boosted Sodium Storage

Ruyao Zhang <sup>1,†</sup>, Yan Dong <sup>1,†</sup>, Yu Su <sup>1</sup>, Wenkai Zhai <sup>1</sup> and Sailong Xu <sup>2,\*</sup>

<sup>1</sup> State Key Laboratory of Chemical Resource Engineering,  
Beijing University of Chemical Technology, Beijing 100029, China;  
2022210730@buct.edu.cn (R.Z.); dongyan2232021@163.com (Y.D.);  
suyu\_yh@163.com (Y.S.); 2021210568@buct.edu.cn (W.Z.)

<sup>2</sup> Quzhou Institute for Innovation in Resource Chemical Engineering,  
Quzhou 324000, China

\* Correspondence: xusl@buct.edu.cn

† These authors contributed equally to this work.

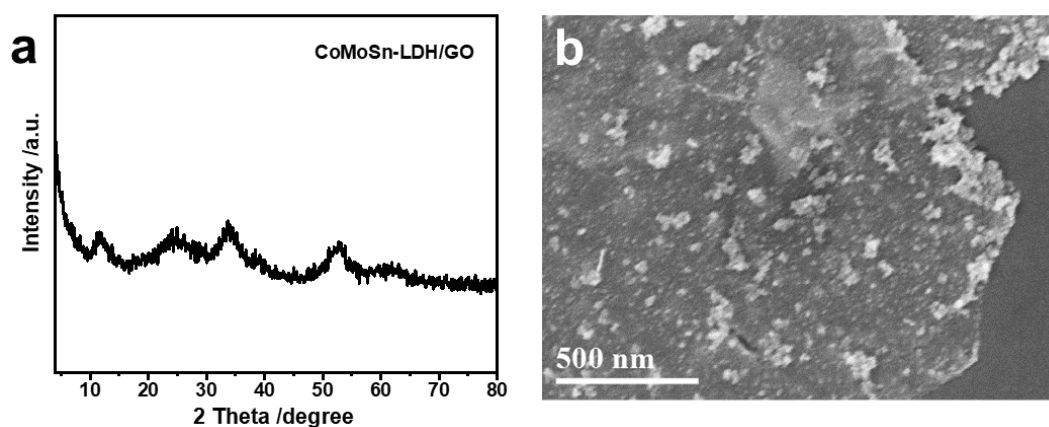

**Figure S1.** The CoMoSn-LDH/GO precursor: (a) XRD pattern, (b) SEM image.

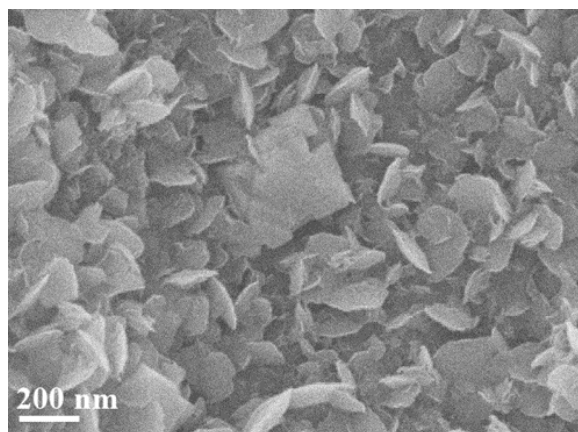

**Figure S2.** The SEM image of the MoS<sub>2</sub>/SnS/CoS@rGO composite.

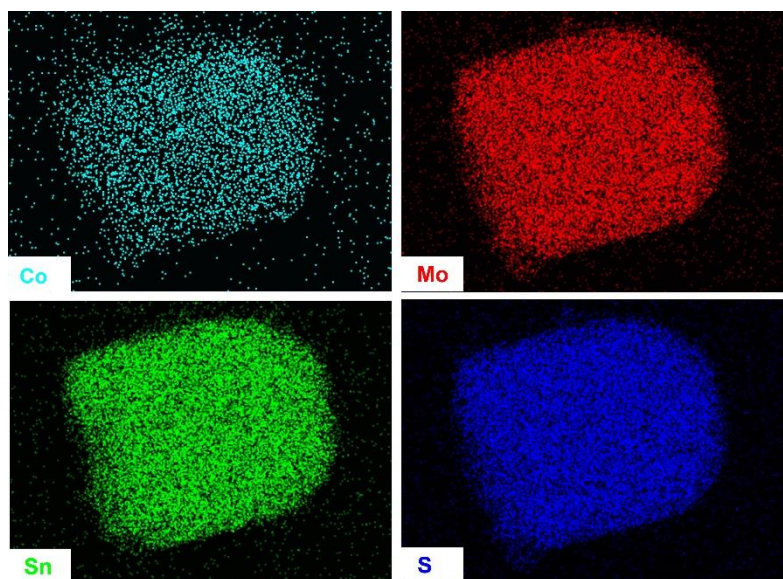

**Figure S3.** The EDS Mapping images of the Co, Mo, Sn and S elements in the MoS<sub>2</sub>/SnS/CoS@rGO composite.

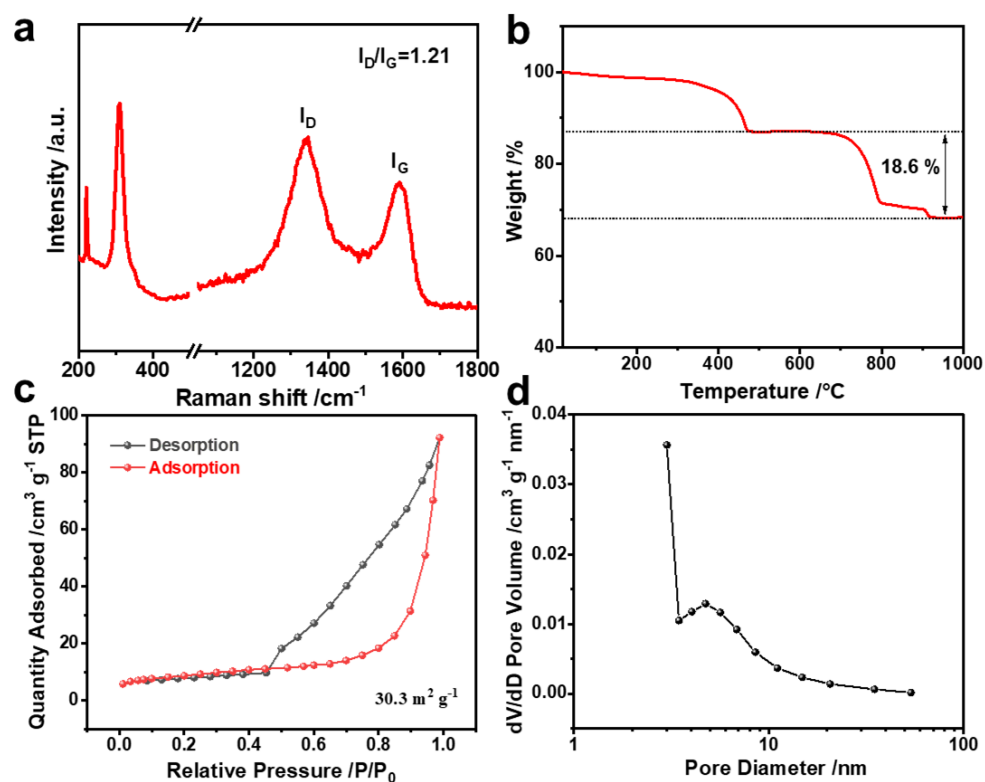

**Figure S4.** The MoS<sub>2</sub>/SnS/CoS@rGO composite. (a) Raman spectroscopy, (b) TG curve, (c) N<sub>2</sub> adsorption and desorption curves and (d) the corresponding pore size distribution.

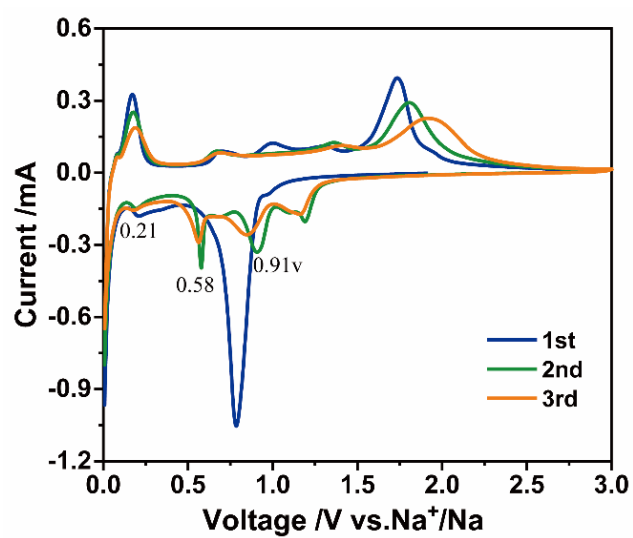

**Figure S5.** The initial three CV curves of MoS<sub>2</sub>/SnS/CoS@rGO at 0.1 mV s<sup>-1</sup>.

**Table S1.** Comparison of cycling performances between our MoS<sub>2</sub>/SnS/CoS@rGO and the CoS-based anode nanomaterials for SIBs.

| Anode nanomaterials                       | Current density (A g <sup>-1</sup> ) | Capacity (mA h g <sup>-1</sup> ) | Cycles | Reference                                                                |
|-------------------------------------------|--------------------------------------|----------------------------------|--------|--------------------------------------------------------------------------|
| MoS <sub>2</sub> /CoS@CC                  | 0.5                                  | 605                              | 100    | <i>Nanoscale</i> , 2023, 15, 6822                                        |
| CoS/Co <sub>9</sub> S <sub>8</sub> /N,S-C | 0.1                                  | 409.2                            | 100    | <i>ACS Nano</i> , 2017, 11, 12658                                        |
| CoS@SnS/C sphere                          | 2                                    | 368                              | 1000   | <i>ACS Appl. Energy Mater.</i> 2021, 4, 5574                             |
| FeS <sub>2</sub> /CoS                     | 1.0                                  | 900                              | 610    | <i>J Solid State Electrochem</i> , 2023, DOI: 10.1007/s10008-023-05544-4 |
| CoS/Cu <sub>2</sub> S@C-NC                | 2.0                                  | 435.3                            | 1000   | <i>Small</i> 2023, 19, 2302706                                           |
| CuS@CoS <sub>2</sub>                      | 5.0                                  | 304                              | 500    | <i>Angew. Chem. Int. Ed.</i> 2019, 58, 7739                              |
| NiS <sub>2</sub> @CoS <sub>2</sub>        | 0.1                                  | 848                              | —      | <i>J Colloid Interf. Sci.</i> 2023, 633, 480                             |
| CoS-HNP@CFs                               | 0.1                                  | 670                              | —      | <i>ACS Appl. Mater. Interfaces</i> 2018, 10, 40531                       |
| CoS /NC@VS <sub>4</sub>                   | 1.0                                  | 307                              | 700    | <i>J Colloid Interf. Sci.</i> 2022, 625, 41                              |
| MoS /CoS-rGO                              | 5.0                                  | 215                              | 50     | <i>J Colloid Interf. Sci.</i> 2020, 575, 42                              |
| CoS/SnS/C                                 | 0.1                                  | 463                              | 100    | <i>J Colloid Interf. Sci.</i> 2022, 609, 403                             |
| MoS <sub>2</sub> /SnS/CoS@rGO             | 0.1                                  | 620                              | 100    | <b>This work</b>                                                         |
|                                           | 5.0                                  | 304                              | 1000   |                                                                          |

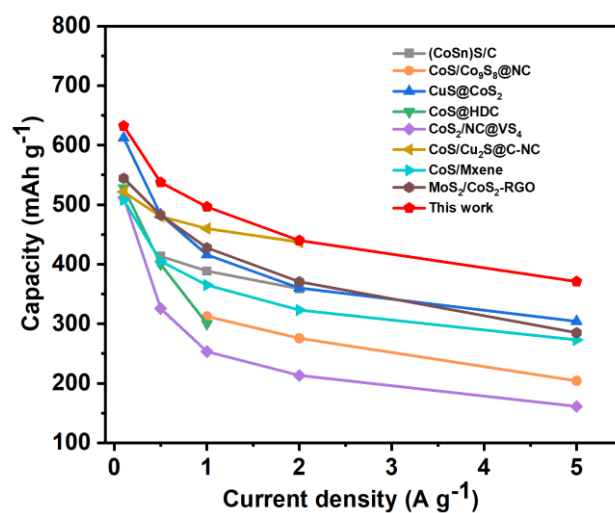

**Figure S6.** Comparison of rate capability between MoS<sub>2</sub>/SnS/CoS@rGO and those reported sulfides that are listed in Refs. [38–40,53–57] in the text.

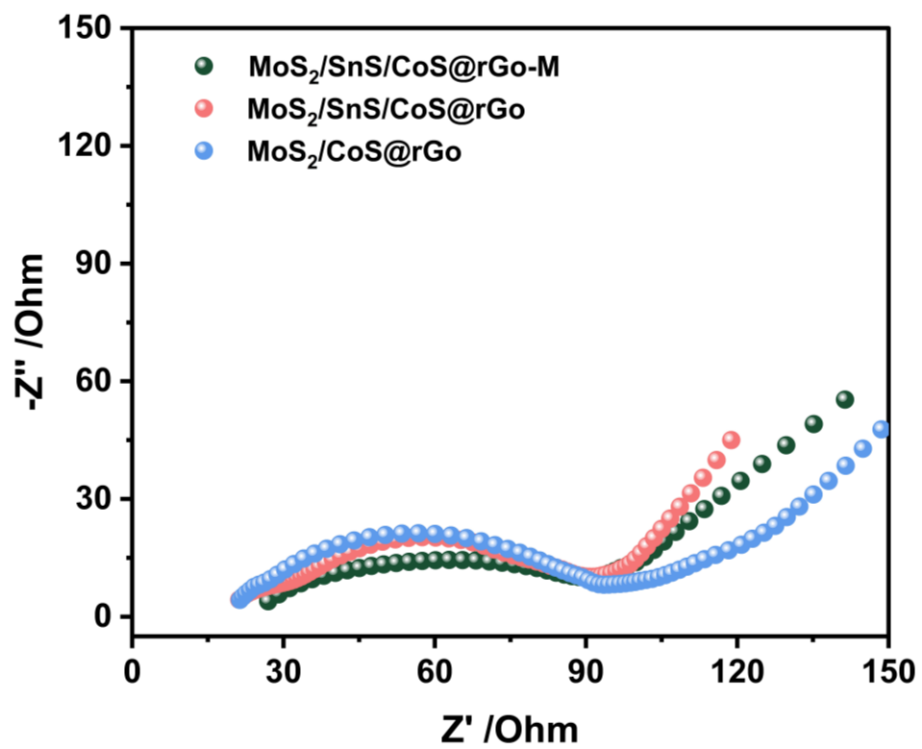

**Figure S7.** Nyquist plots of  $\text{MoS}_2/\text{SnS}/\text{CoS}@r\text{Go}$ ,  $\text{MoS}_2/\text{CoS}@r\text{Go}$ , and  $\text{MoS}_2/\text{SnS}/\text{CoS}@r\text{Go-M}$ .



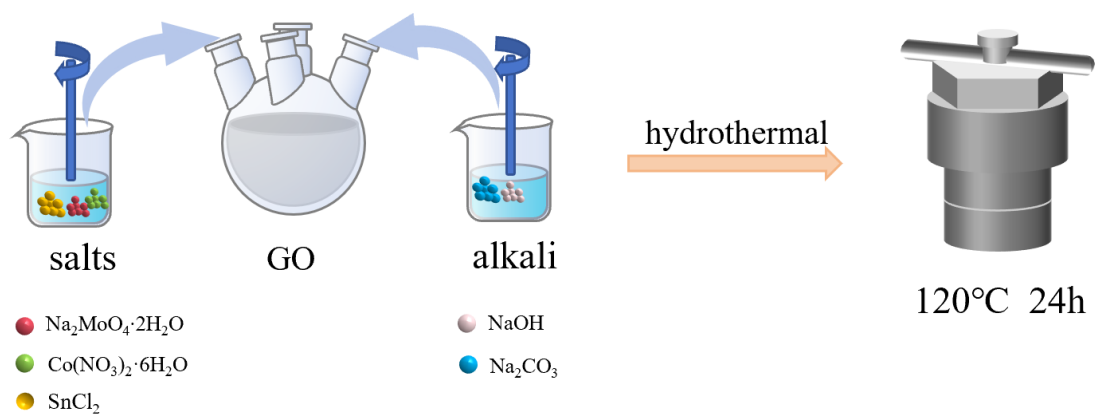

**Scheme S1.** Schematic illustration of the preparation of the CoMoSn-LDH/GO precursor.

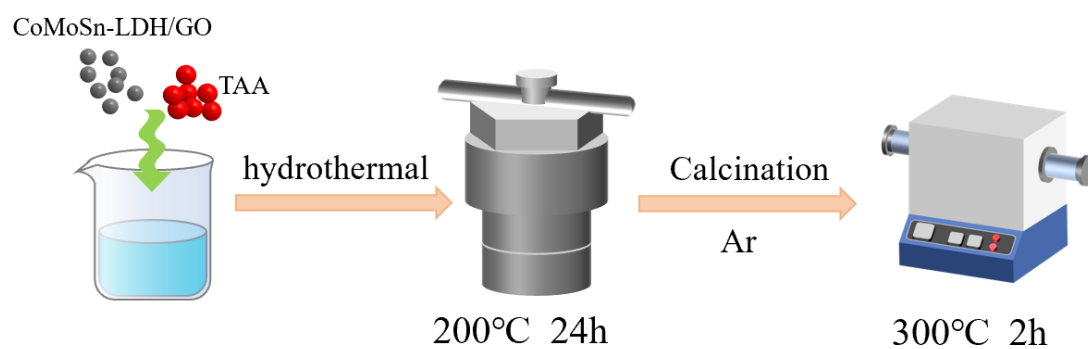

**Scheme S2.** Schematic illustration of the preparation of the MoS<sub>2</sub>/SnS/CoS@rGO composite.
